# Supplementary material
Source: Springer Nature journal article supplement (https://www.springermedizin.de/resource/supplementary/12889_2012_3992_MOESM1_ESM.pdf/9490912)

**academic year**

**2010/2011**

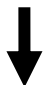

**2011/2012**

**2012/2013**

**2013/2014**

**intervention group**

start of intervention  
(during whole  
academic year)

continuation of  
intervention

continuation of  
intervention

continuation of  
intervention

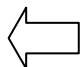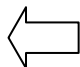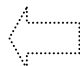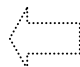

Baseline  
measurements

Follow-up  
measurements

Further  
measurements

Further  
measurements

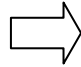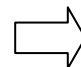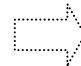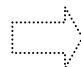

**control group**

regular education  
without intervention  
(during whole  
academic year)

start of intervention

continuation of  
intervention

continuation of  
intervention

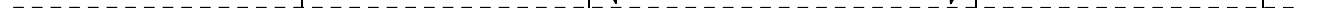

Supplement: MOESM1 [file 9490912]
